# Supplementary material for: Anthraquinone derivatives as electron-acceptors with liquid crystalline properties
Source: Royal Society of Chemistry journal article supplement (doi:10.1039/c2cp23224c), 2012-01-01
Supplement: c2cp23224c.pdf [file c2cp23224c.pdf]

## Electronic Supplementary Information:

# Anthraquinone Derivatives as Electron-Acceptors with Liquid Crystalline Properties

*Amy E. Murschell, Wang Hay Kan, Venkataraman Thangadurai and Todd C. Sutherland\**

Department of Chemistry, University of Calgary, 2500 University Drive NW, Calgary, Alberta, Canada

T2N 1N4

sutherlt@ucalgary.ca

### Table of Contents

|                                                                                                               |     |
|---------------------------------------------------------------------------------------------------------------|-----|
| NMR spectra of quinones <b>1 – 3</b>                                                                          | 2-4 |
| IR spectra of <b>1 - 3</b>                                                                                    | 5   |
| Normalized absorption spectra of <b>1</b> and <b>2</b>                                                        | 5   |
| Fluorescence spectra of <b>1 - 3</b>                                                                          | 5   |
| Cyclic voltammograms of <b>1 - 3</b>                                                                          | 6-7 |
| FMOs of quinones <b>1 – 3</b> and their radical anions.                                                       | 7   |
| Spin density maps of radical anions <b>1<sup>•-</sup></b> , <b>2<sup>•-</sup></b> and <b>3<sup>•-</sup></b> . | 8   |
| DSC thermograms of quinones <b>1 – 3</b>                                                                      | 8   |
| P-XRD peak data table                                                                                         | 9   |

1

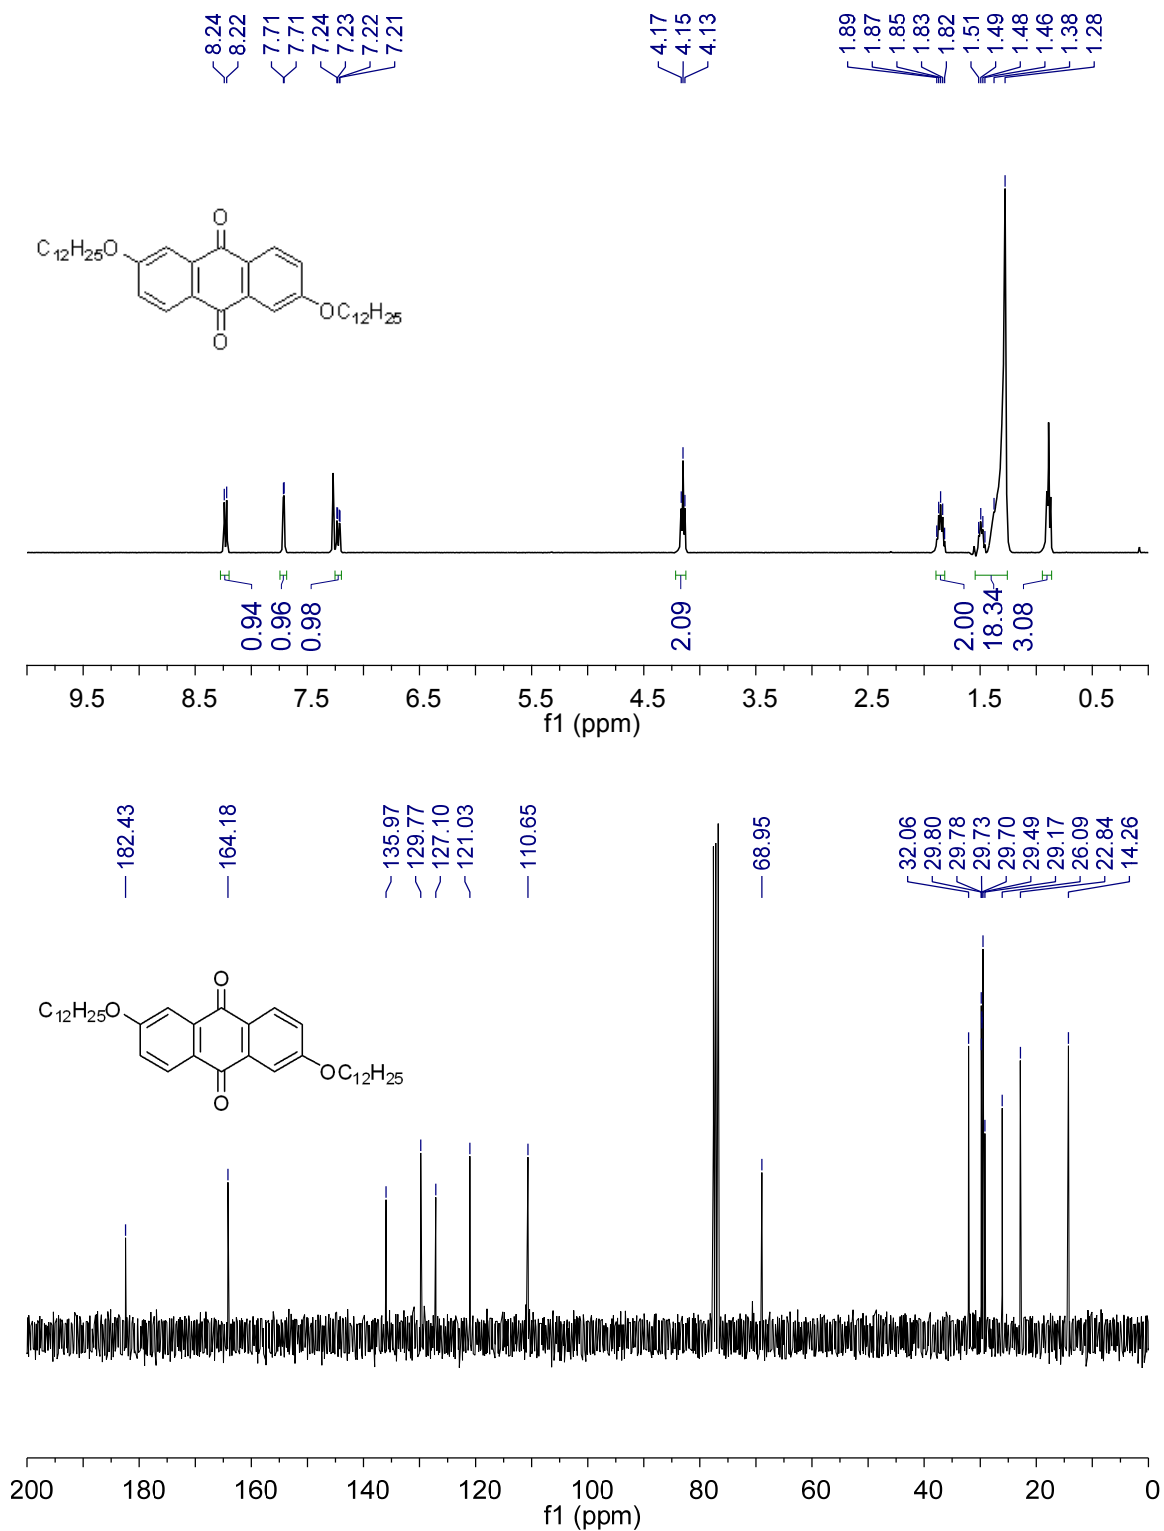

2

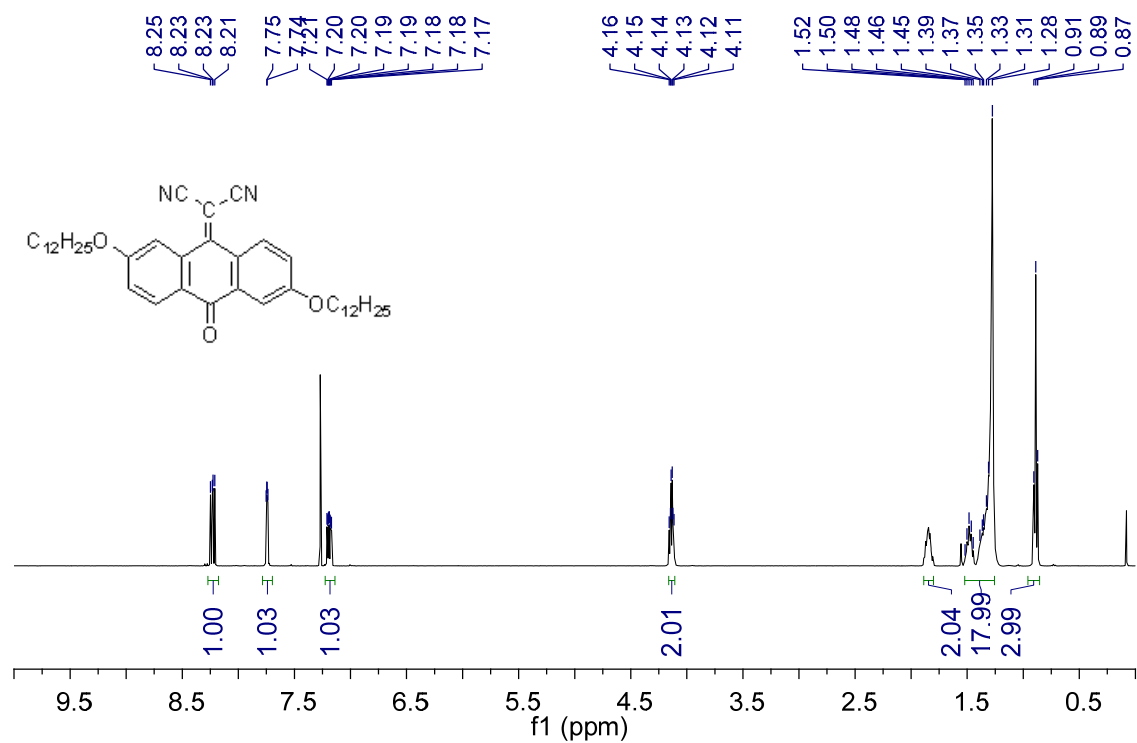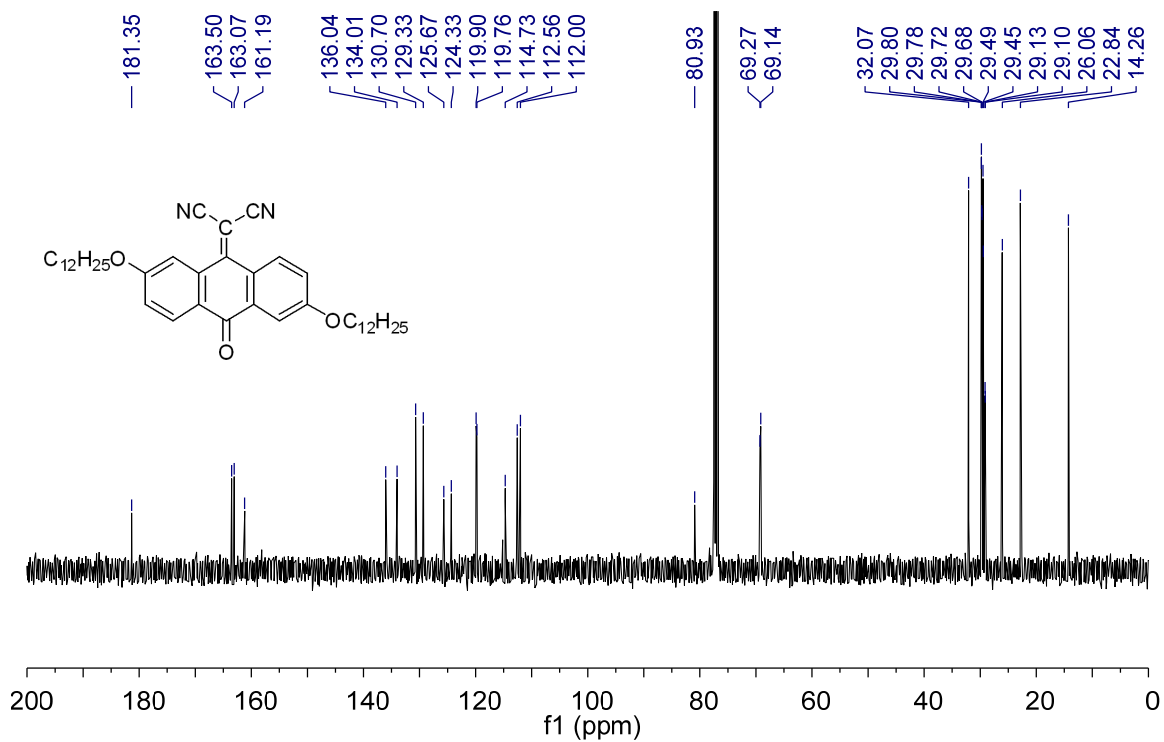

3

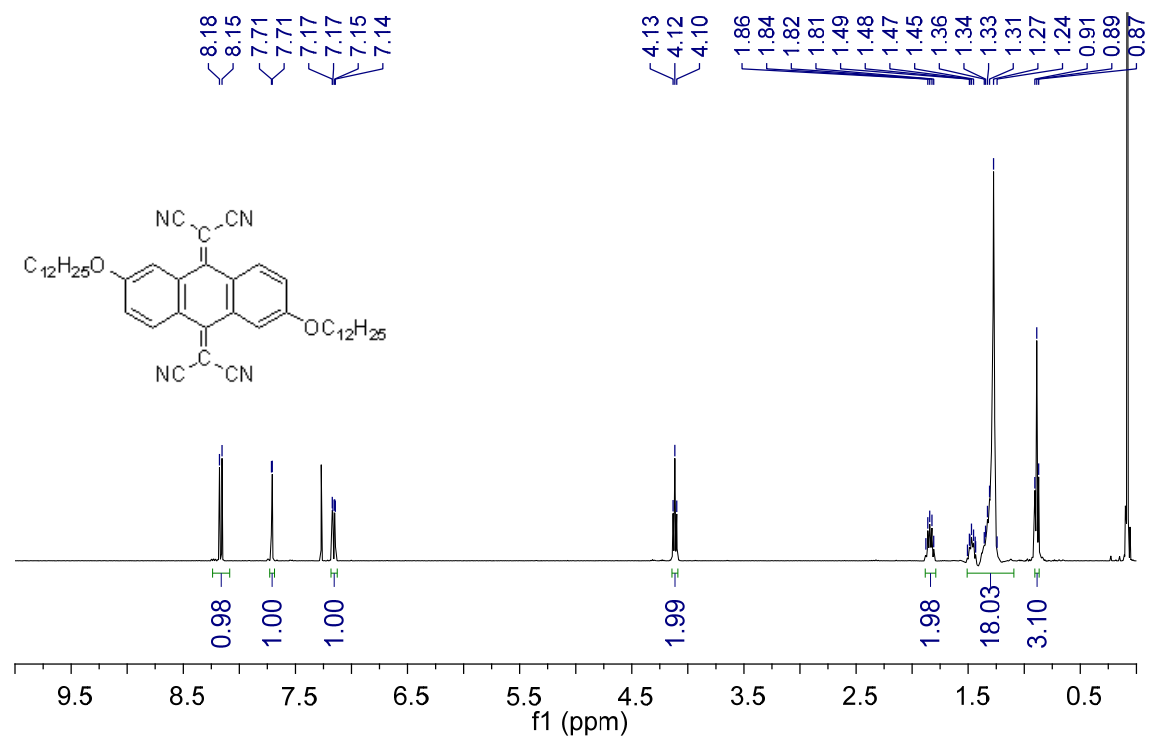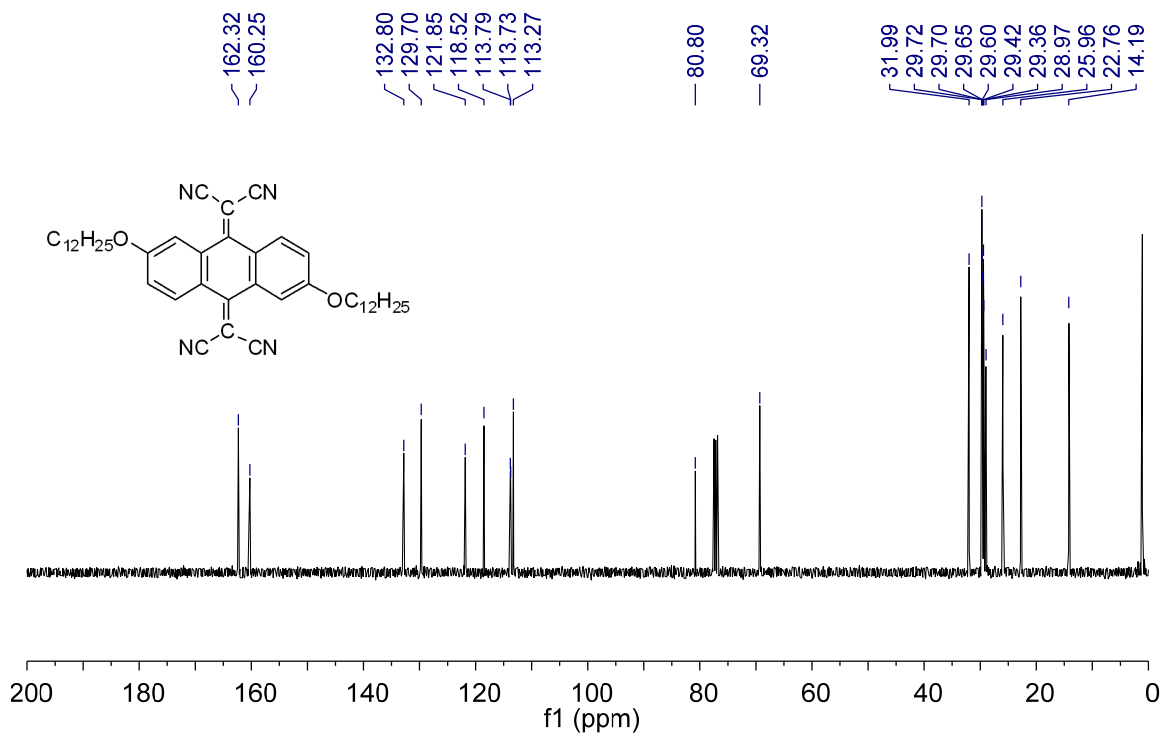

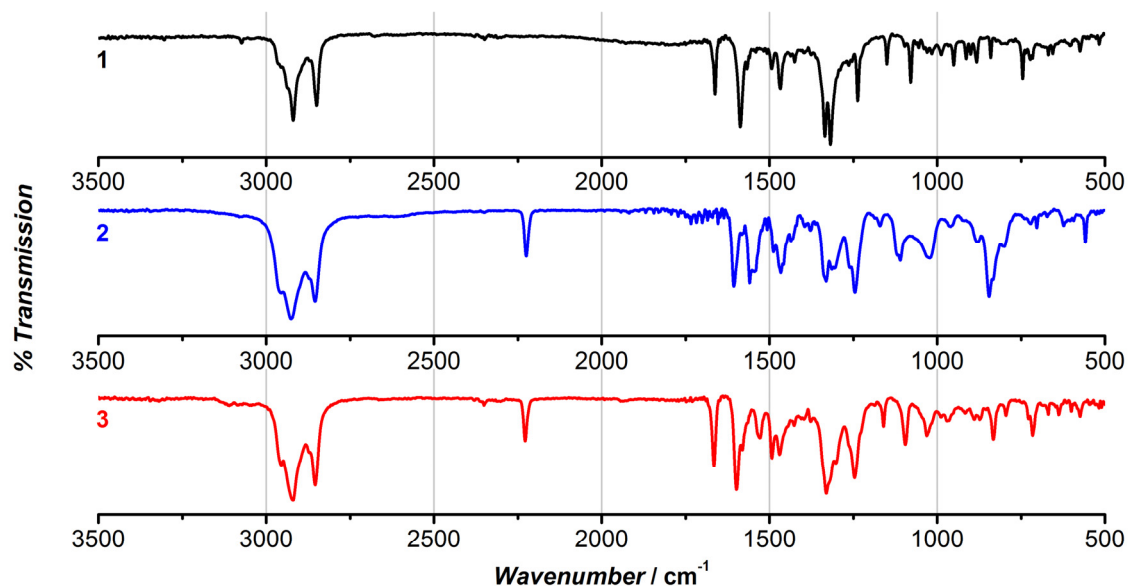

Figure 1. IR spectra of **1**, **2**, and **3** on NaCl plates.

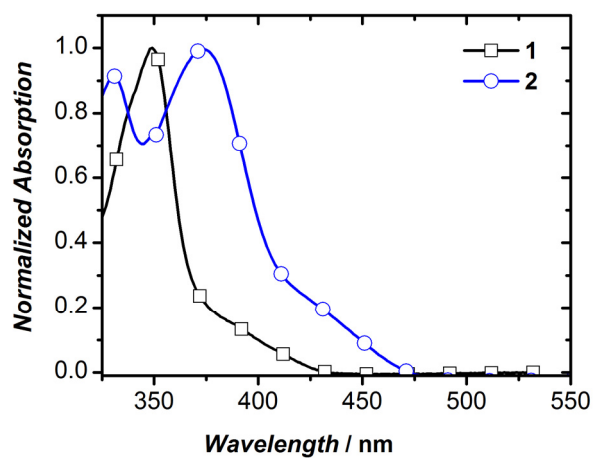

Figure 2. Normalized absorption spectra of **1** and **2** in  $\text{CH}_2\text{Cl}_2$  highlighting the weak n- $\pi^*$  transitions.

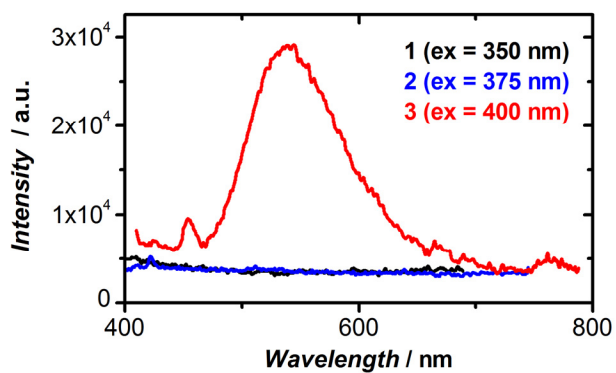

Figure 3. Fluorescence spectra of  $10^{-4}$  M ( $\text{CH}_2\text{Cl}_2$ ) quinones **1**, **2**, and **3**.

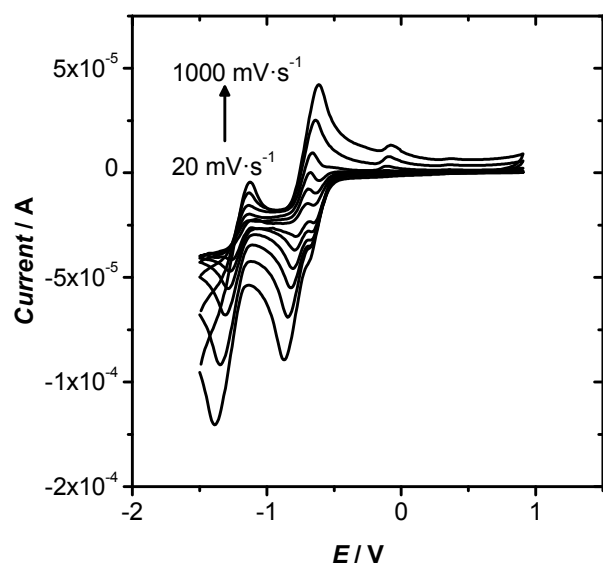

**Figure 4.** Cyclic voltammograms of 1.4 mM **1** in CH<sub>2</sub>Cl<sub>2</sub> at 20, 50 100, 200, 500 and 1000 mV·s<sup>-1</sup>.

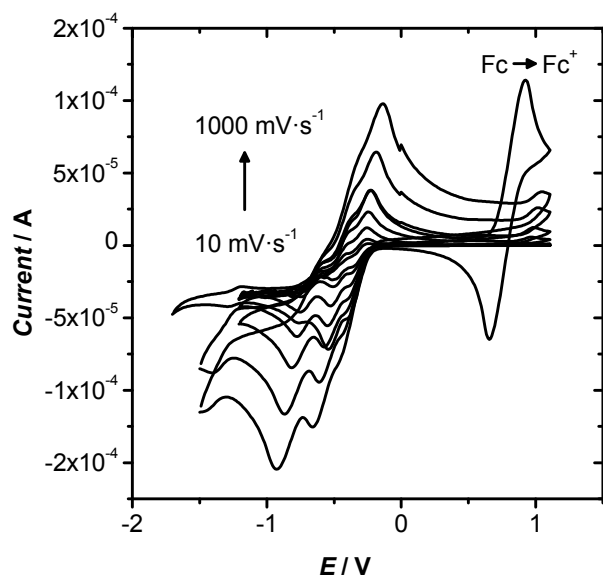

**Figure 5.** Cyclic voltammograms of 1.9 mM **2** in CH<sub>2</sub>Cl<sub>2</sub> at 10, 20, 50 100, 200, 500 and 1000 mV·s<sup>-1</sup>.

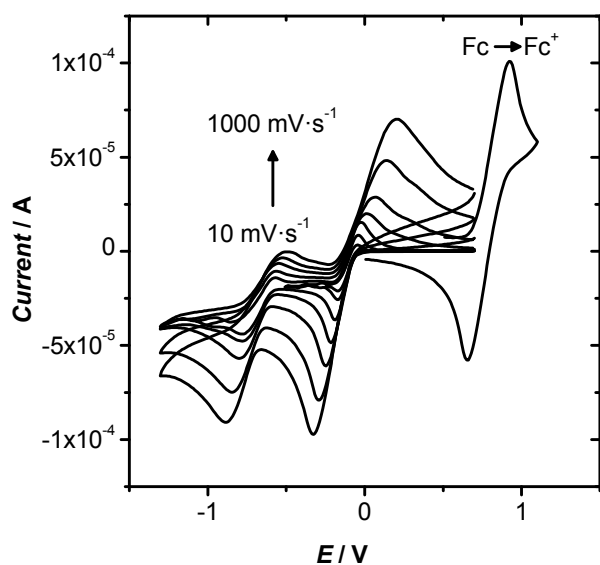

**Figure 6.** Cyclic voltammograms of 1.7 mM **3** in  $\text{CH}_2\text{Cl}_2$  at 10, 20, 50 100, 200, 500 and 1000  $\text{mV}\cdot\text{s}^{-1}$ .

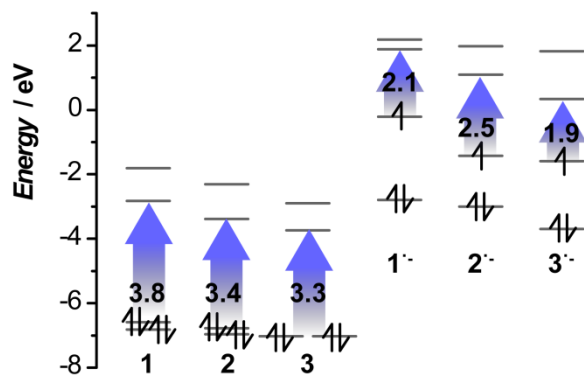

**Figure 7.** FMOs of quinones **1** – **3** and their radical anions.

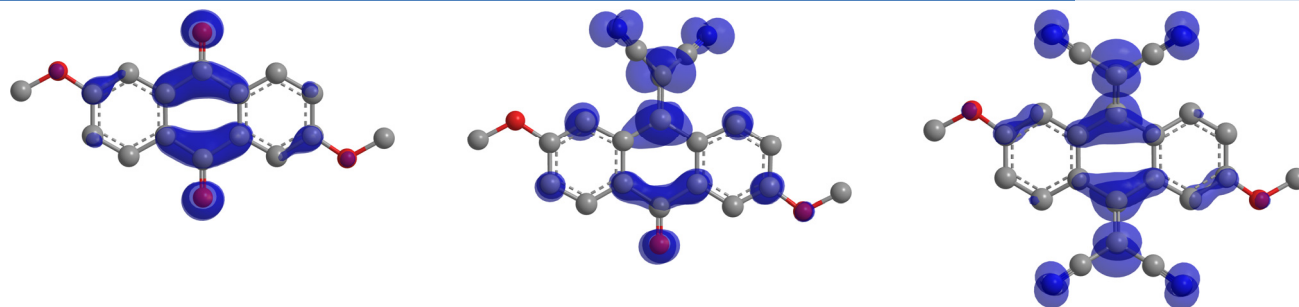

**Figure 8.** Spin density maps of radical anions  $1^{\bullet-}$ ,  $2^{\bullet-}$  and  $3^{\bullet-}$ .

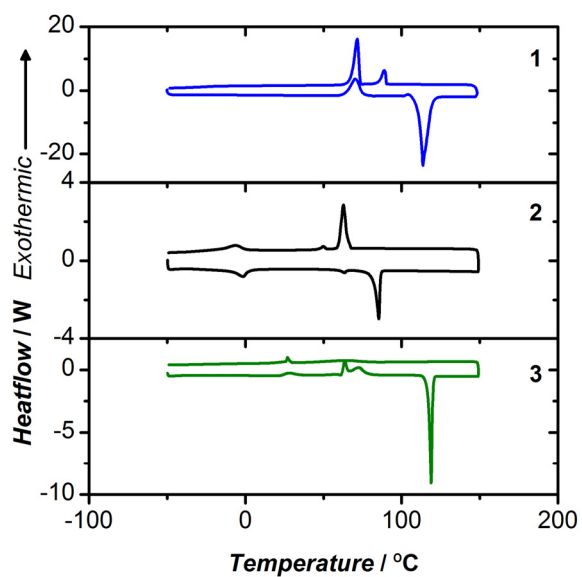

**Figure 9.** DSC thermograms of quinones **1** – **3** under  $N_2$  atmosphere during heating (bottom traces) and cooling (top traces) at  $5\text{ }^{\circ}\text{C}\cdot\text{min}^{-1}$  between  $-50\text{ }^{\circ}\text{C}$  and  $150\text{ }^{\circ}\text{C}$ .



**Table 1.** Summary of P-XRD peaks with Miller indices.

| Compound | Temperature | Measured spacing ( <i>d</i> )<br>Å | Miller index |
|----------|-------------|------------------------------------|--------------|
| <b>1</b> | 85 °C       | 27.2                               | (100)        |
| <b>1</b> | 30 °C       | 19.6                               | (100)        |
|          |             | 10.3                               | (200)        |
|          |             | 7.3                                | (300)        |
|          |             | 5.2                                | (400)        |
| <b>2</b> | 55 °C       | 26.9                               | (100)        |
|          |             | 14.3                               | (200)        |
|          |             | 9.8                                | (300)        |
|          |             | 3.4                                | (001)        |
| <b>2</b> | 30 °C       | 26.6                               | (100)        |
|          |             | 14.2                               | (200)        |
|          |             | 9.7                                | (300)        |
|          |             | 3.3                                | (001)        |
